# Supplementary material for: Dynamic urea bond for the design of reversible and self-healing polymers
Source: Springer Nature journal article supplement (doi:10.1038/ncomms4218), 2014-02-04
Supplement: 41467_2014_BFncomms4218_MOESM3_ESM.mol [file 41467_2014_BFncomms4218_MOESM3_ESM.mol]

  ChemDraw01201409502D

 18 17  0  0  0  0  0  0  0  0999 V2000
   -0.0025    0.4147    0.0000 C   0  0  0  0  0  0  0  0  0  0  0  0
    0.7120    0.0022    0.0000 N   0  0  0  0  0  0  0  0  0  0  0  0
    1.4265    0.4147    0.0000 C   0  0  0  0  0  0  0  0  0  0  0  0
    2.1409    0.0022    0.0000 N   0  0  0  0  0  0  0  0  0  0  0  0
    1.4265    1.2397    0.0000 O   0  0  0  0  0  0  0  0  0  0  0  0
    2.1409   -0.8257    0.0000 C   0  0  0  0  0  0  0  0  0  0  0  0
    2.8579    0.4161    0.0000 C   0  0  0  0  0  0  0  0  0  0  0  0
   -0.7170    0.0022    0.0000 C   0  0  0  0  0  0  0  0  0  0  0  0
   -1.4314    0.4147    0.0000 O   0  0  0  0  0  0  0  0  0  0  0  0
   -2.1459    0.0022    0.0000 C   0  0  0  0  0  0  0  0  0  0  0  0
   -2.8604    0.4147    0.0000 C   0  0  0  0  0  0  0  0  0  0  0  0
   -3.5748    0.0022    0.0000 C   0  0  0  0  0  0  0  0  0  0  0  0
   -2.8604    1.2397    0.0000 C   0  0  0  0  0  0  0  0  0  0  0  0
   -2.1459   -0.8228    0.0000 O   0  0  0  0  0  0  0  0  0  0  0  0
    3.5748    0.0022    0.0000 C   0  0  0  0  0  0  0  0  0  0  0  0
    2.4439    1.1331    0.0000 C   0  0  0  0  0  0  0  0  0  0  0  0
    3.2718    1.1331    0.0000 C   0  0  0  0  0  0  0  0  0  0  0  0
    2.8579   -1.2397    0.0000 C   0  0  0  0  0  0  0  0  0  0  0  0
  1  2  1  0      
  2  3  1  0      
  3  4  1  0      
  3  5  2  0      
  4  6  1  0      
  7  4  1  0      
  1  8  1  0      
  8  9  1  0      
  9 10  1  0      
 10 11  1  0      
 11 12  2  0      
 11 13  1  0      
 10 14  2  0      
  7 15  1  0      
  7 16  1  0      
  7 17  1  0      
  6 18  1  0      
M  END
